# Supplementary material for: Grave-to-cradle dry reforming of plastics via Joule heating
Source: PubMed Central journal article supplement — Nat Commun. 2024 Sep 20;15:8243. doi: 10.1038/s41467-024-52515-y (PMC11415348; doi:10.1038/s41467-024-52515-y), 2024-09-20
Supplement: 41467_2024_52515_MOESM1_ESM.pdf [file 41467_2024_52515_MOESM1_ESM.pdf]

# Grave-to-cradle Dry Reforming of Plastics via Joule Heating

Qing Ma,<sup>[a]</sup> Yongjun Gao,<sup>\*[a]</sup> Bo Sun<sup>[b]</sup> Jianlong Du,<sup>[a]</sup> Hong Zhang<sup>[a]</sup> and Ding Ma<sup>\*[b]</sup>

[a] Hebei Research Center of the Basic Discipline of Synthetic Chemistry, College of Chemistry and Materials Science, Hebei University, Baoding, 071002, China

[b] Beijing National Laboratory for Molecular Sciences, New Cornerstone Science Laboratory, College of Chemistry and Molecular Engineering, Peking University, Beijing 100871, China

\*Corresponding author: Yongjun Gao ([yjgao@hbu.edu.cn](mailto:yjgao@hbu.edu.cn)), Ding Ma ([dma@pku.edu.cn](mailto:dma@pku.edu.cn))

## Contents

|                                                                                                                                                                                                                                                                                                       |    |
|-------------------------------------------------------------------------------------------------------------------------------------------------------------------------------------------------------------------------------------------------------------------------------------------------------|----|
| Supplementary Methods.....                                                                                                                                                                                                                                                                            | 2  |
| Transmission Electron Microscope (TEM) characterization.....                                                                                                                                                                                                                                          | 2  |
| Scanning Electron Microscope (SEM) characterization and Energy-dispersive X-ray spectroscopy (EDS).....                                                                                                                                                                                               | 2  |
| Supplementary Figures.....                                                                                                                                                                                                                                                                            | 3  |
| Supplementary Fig. 1 Infrared thermal image and optical image of experimental device. Reaction conditions:14 mg PE, 44 mg CO <sub>2</sub> , 4 A(6 Ω). .....                                                                                                                                           | 3  |
| Supplementary Fig. 2 SEM and Energy-dispersive X-ray spectroscopy (EDS) mapping images of fresh FeCrAl heating wire.....                                                                                                                                                                              | 4  |
| Supplementary Fig. 3 SEM images of carbon fibers a) before and b) after reaction. Experimental conditions: 14 mg PE, 44 mg CO <sub>2</sub> , 15 min.....                                                                                                                                              | 5  |
| Supplementary Fig. 4 Attenuated Total Reflection Fourier Transform Infrared (ATR-FTIR) spectra of solid samples (PE reforming with CO <sub>2</sub> after different reaction time) at different reaction time. Reaction conditions:14 mg PE, 44 mg CO <sub>2</sub> , 4 A(6 Ω). .....                   | 6  |
| Supplementary Fig. 5 Mass spectrometric signals of pulse experiments. a The dehydrogenation of methane. b the CO <sub>2</sub> reduction over unelectrified / electrified FeCrAl resistance wire. Experimental conditions: Ar =10 mL/min, CH <sub>4</sub> =10 mL/min, CO <sub>2</sub> =10 mL/min. .... | 7  |
| Supplementary Fig. 6 Raman spectra of electrified FeCrAl wire at different reforming time. ....                                                                                                                                                                                                       | 8  |
| Supplementary Fig. 7 Attenuated Total Reflection Fourier Transform Infrared (ATR-FTIR) spectra of FeCrAl wire at different reaction time. Reaction conditions:14 mg PE, 44 mg CO <sub>2</sub> , 4 A (6 Ω). .....                                                                                      | 9  |
| Supplementary Fig. 8 TEM image of residual carbon achieved in PE dehydrogenation. Reaction conditions: 14 mg PE, Ar, 4 A (6 Ω), 15 min. ....                                                                                                                                                          | 10 |
| Supplementary Fig. 9 SEM image of residual carbon achieved in PE dehydrogenation. Reaction conditions:14 mg PE, Ar, 4 A (6 Ω), 15 min. ....                                                                                                                                                           | 11 |
| Supplementary Tables.....                                                                                                                                                                                                                                                                             | 12 |
| Supplementary Table 1. The detailed weight analysis from one practical experiment. <sup>1</sup> .....                                                                                                                                                                                                 | 12 |

|                                                                                                                                                                                          |    |
|------------------------------------------------------------------------------------------------------------------------------------------------------------------------------------------|----|
| Supplementary Table 2. The detailed products distribution, carbon balance and mass balance in the PE dehydrogenation.....                                                                | 12 |
| Supplementary Table 3. The detailed products distribution with carbon fiber as heating element in dry reforming of PE. ....                                                              | 13 |
| Supplementary Table 4. The quantitative analysis of various products from the large-scale reaction <sup>1</sup> .....                                                                    | 13 |
| Supplementary Table 5. Oxygen balance during the CO <sub>2</sub> reduction .....                                                                                                         | 13 |
| Supplementary Table 6. Life cycle inventory (LCI) for LCA calculation model .....                                                                                                        | 14 |
| Supplementary Table 7. LCI of PV system (collected from GREET software 2022).....                                                                                                        | 14 |
| Supplementary Table 8. The higher heating values (HHV) of gaseous products and chemical energy of PE. .                                                                                  | 16 |
| Supplementary Table 9. The energy recovery efficiency of the reforming system powered by a photovoltaic power system (PV) utilizing solar irradiation or Chinese electricity grids. .... | 17 |

## Supplementary Methods

### Transmission Electron Microscope (TEM) characterization

For TEM characterizations, the samples were dispersed in ethanol and dropped onto 300-mesh carbon-coated copper grids. TEM characterizations were carried out on a FEI Tecnai G2 F20 S-TWIN transmission electron microscope.

### Scanning Electron Microscope (SEM) characterization and Energy-dispersive X-ray spectroscopy (EDS)

A Zeiss Merlin high-resolution scanning electron microscope was used to characterize the surface morphology of the samples after PE dehydrogenation and FeCrAl heating wire. The surface elemental mapping analyses were carried out by EDS detector equipped on the SEM.

## Supplementary Figures

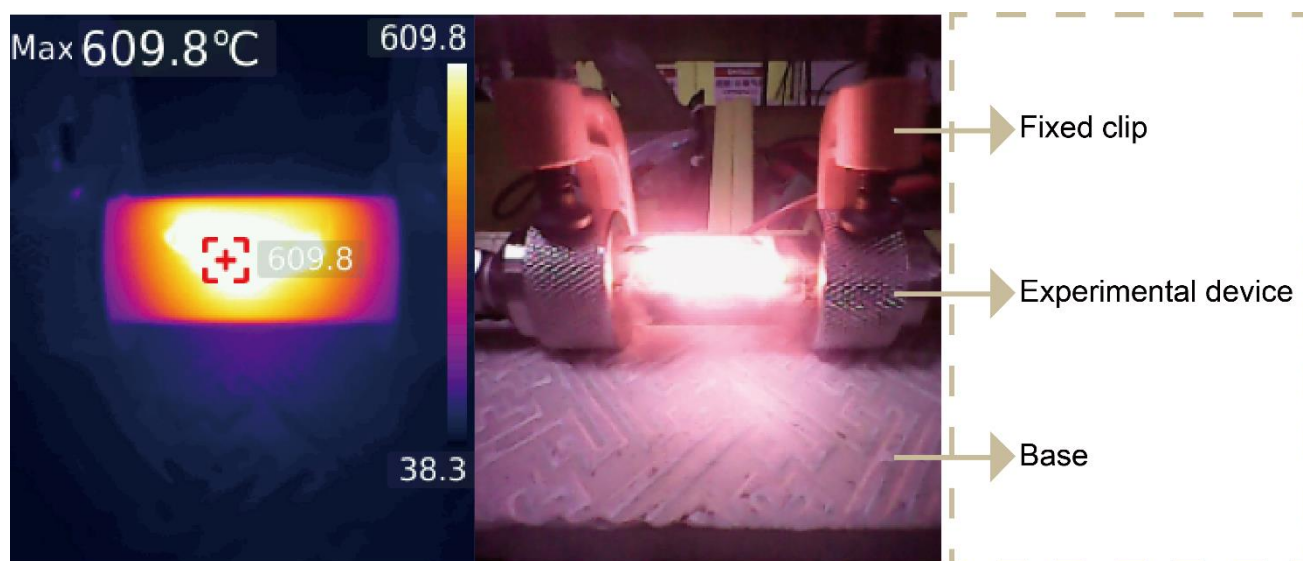

**Supplementary Fig. 1** Infrared thermal image and optical image of experimental device. Reaction conditions: 14 mg PE, 44 mg CO<sub>2</sub>, 4 A(6 Ω).

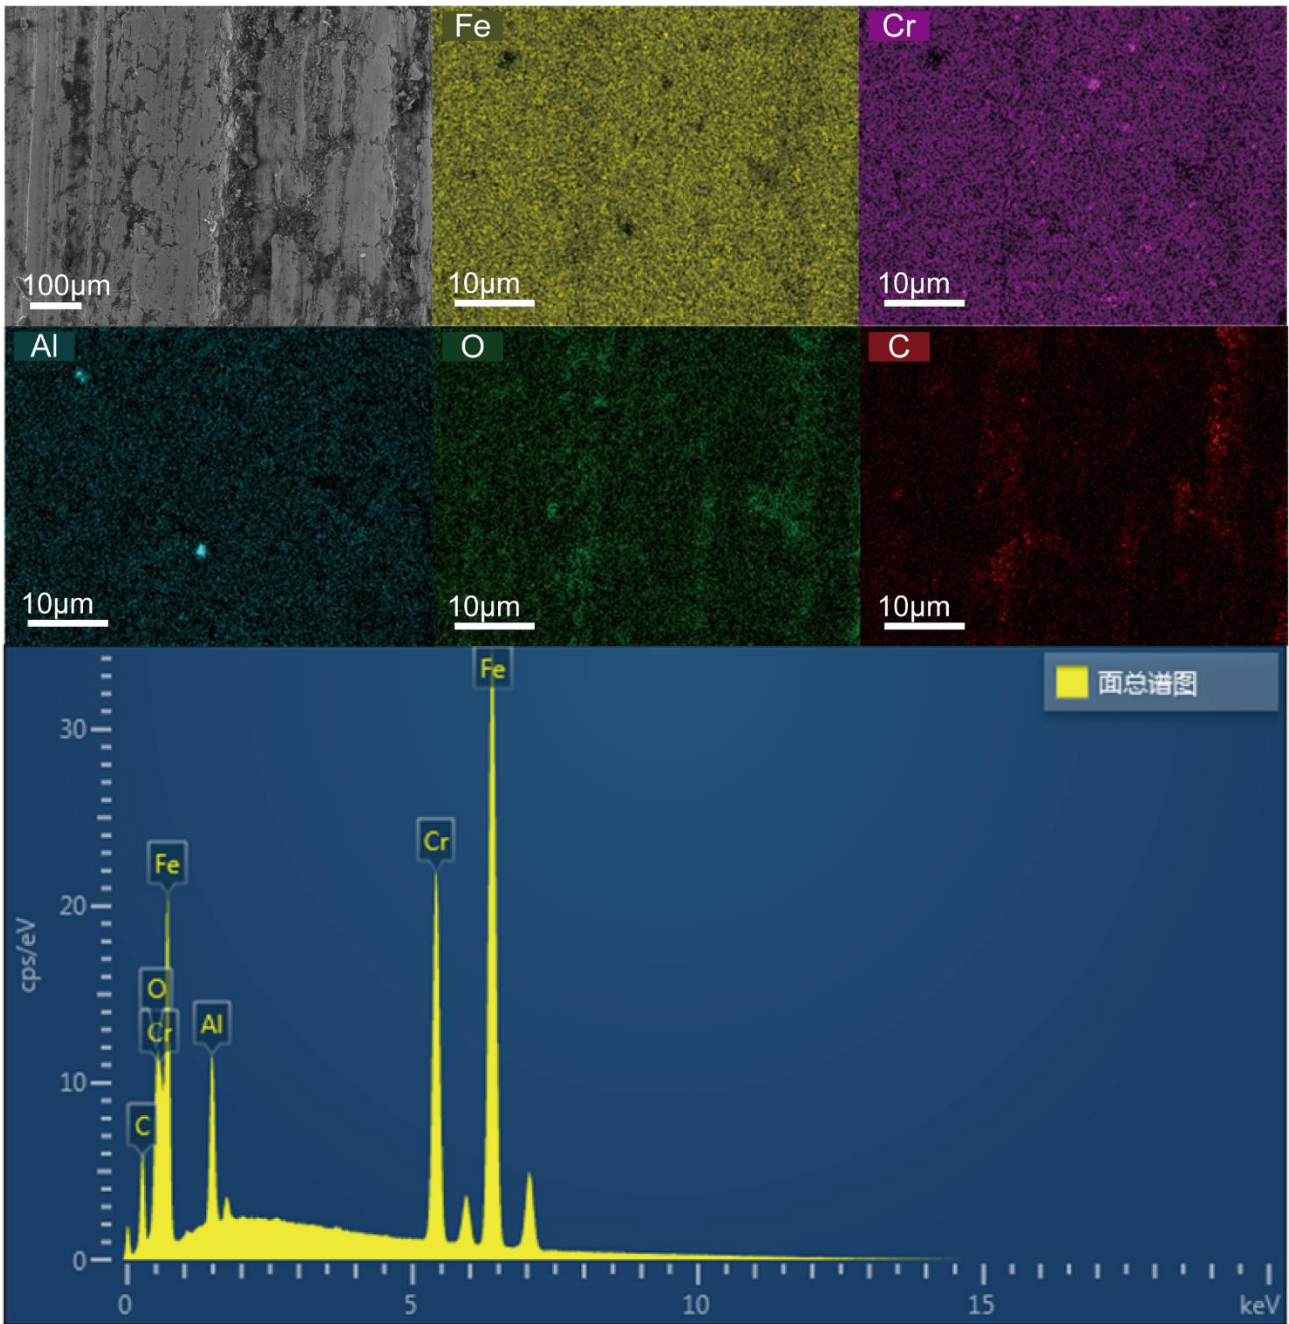

Supplementary Fig. 2 SEM and Energy-dispersive X-ray spectroscopy (EDS) mapping images of fresh FeCrAl heating wire.

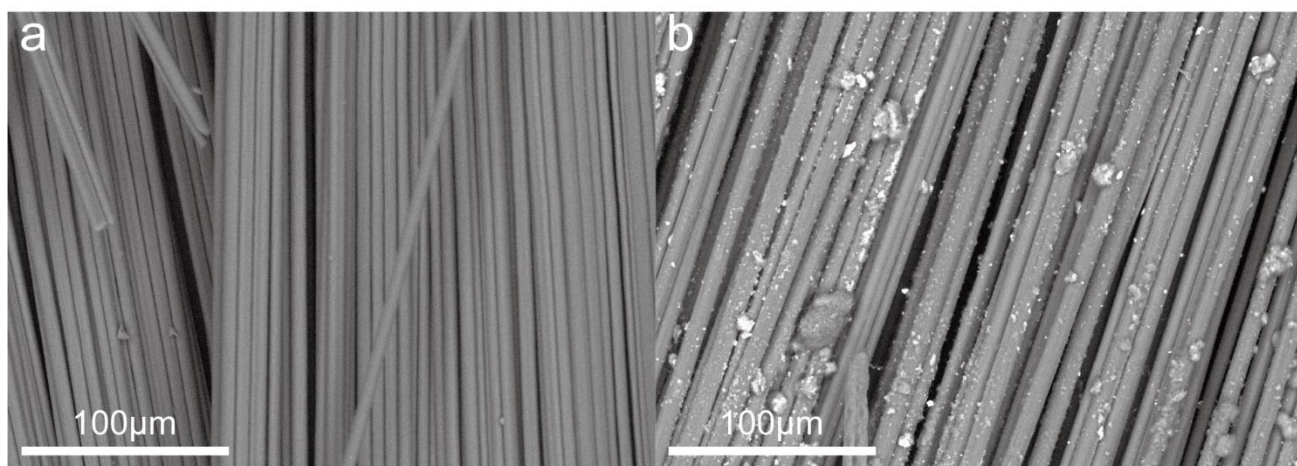

**Supplementary Fig. 3 SEM images of carbon fibers a) before and b) after reaction.** Experimental conditions: 14 mg PE, 44 mg CO<sub>2</sub>, 15 min.

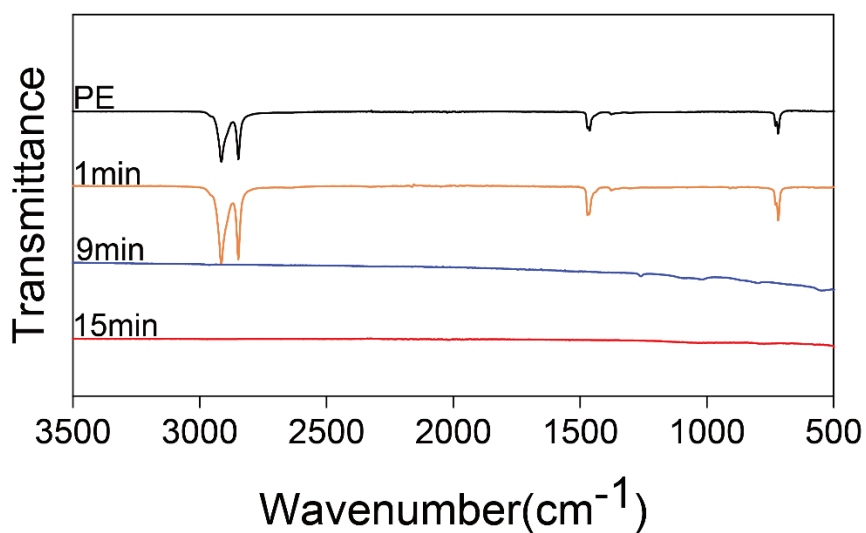

**Supplementary Fig. 4 Attenuated Total Reflection Fourier Transform Infrared (ATR-FTIR) spectra of solid samples (PE reforming with CO<sub>2</sub> after different reaction time) at different reaction time. Reaction conditions: 14 mg PE, 44 mg CO<sub>2</sub>, 4 A(6 Ω).**

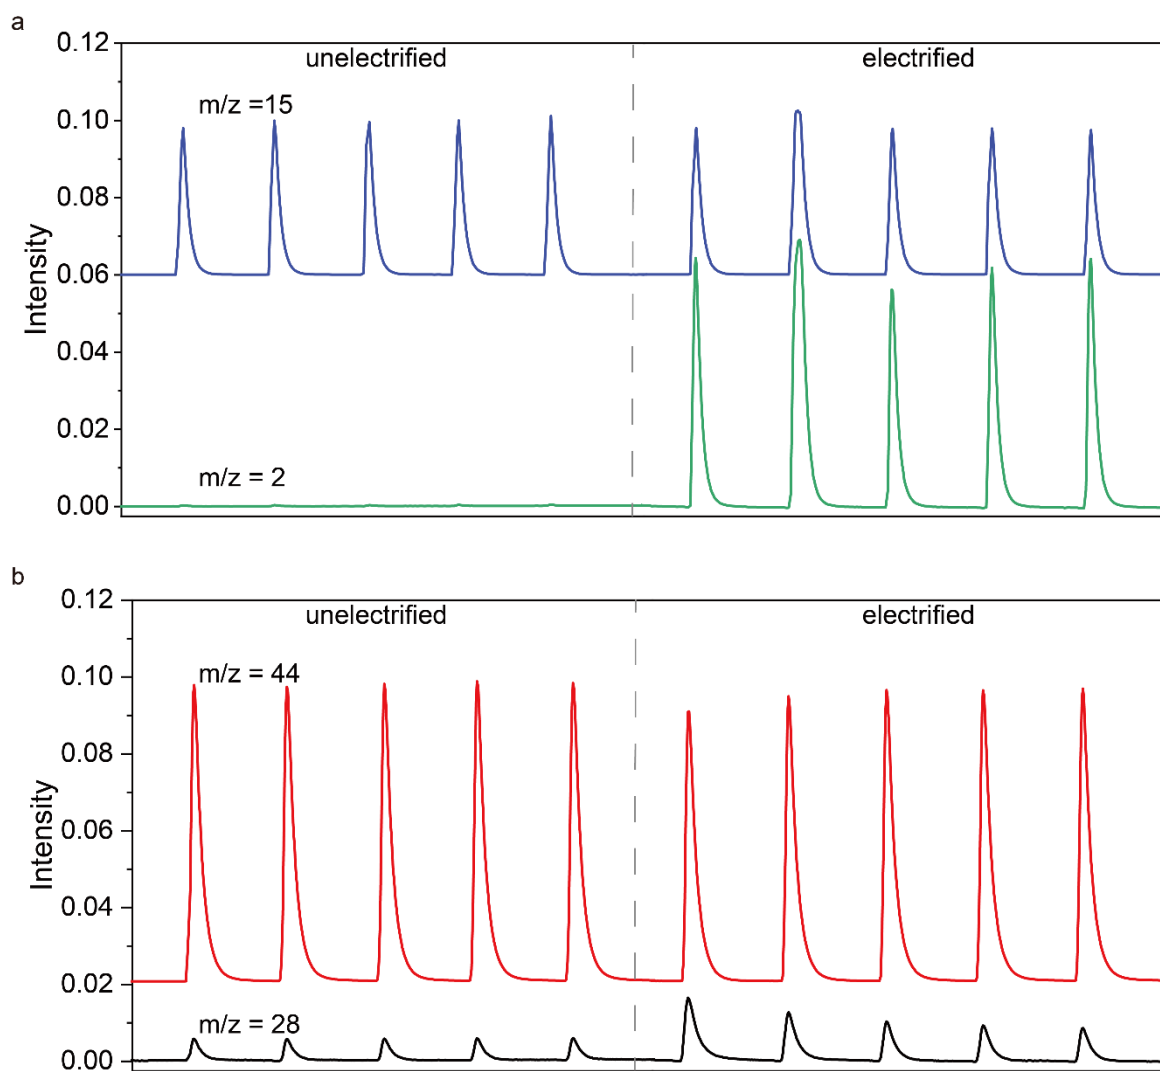

**Supplementary Fig. 5 Mass spectrometric signals of pulse experiments. a** The dehydrogenation of methane. **b** the  $\text{CO}_2$  reduction over unelectrified / electrified FeCrAl resistance wire. Experimental conditions: Ar =10 mL/min,  $\text{CH}_4$  =10 mL/min,  $\text{CO}_2$  =10 mL/min.

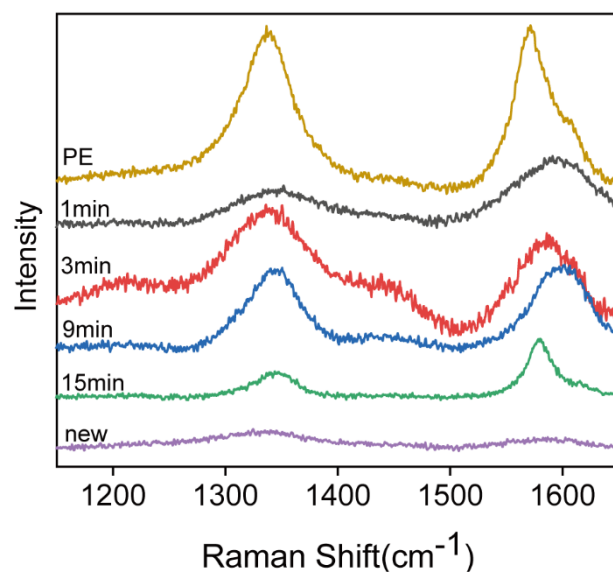

**Supplementary Fig. 6 Raman spectra of electrified FeCrAl wire at different reforming time.**



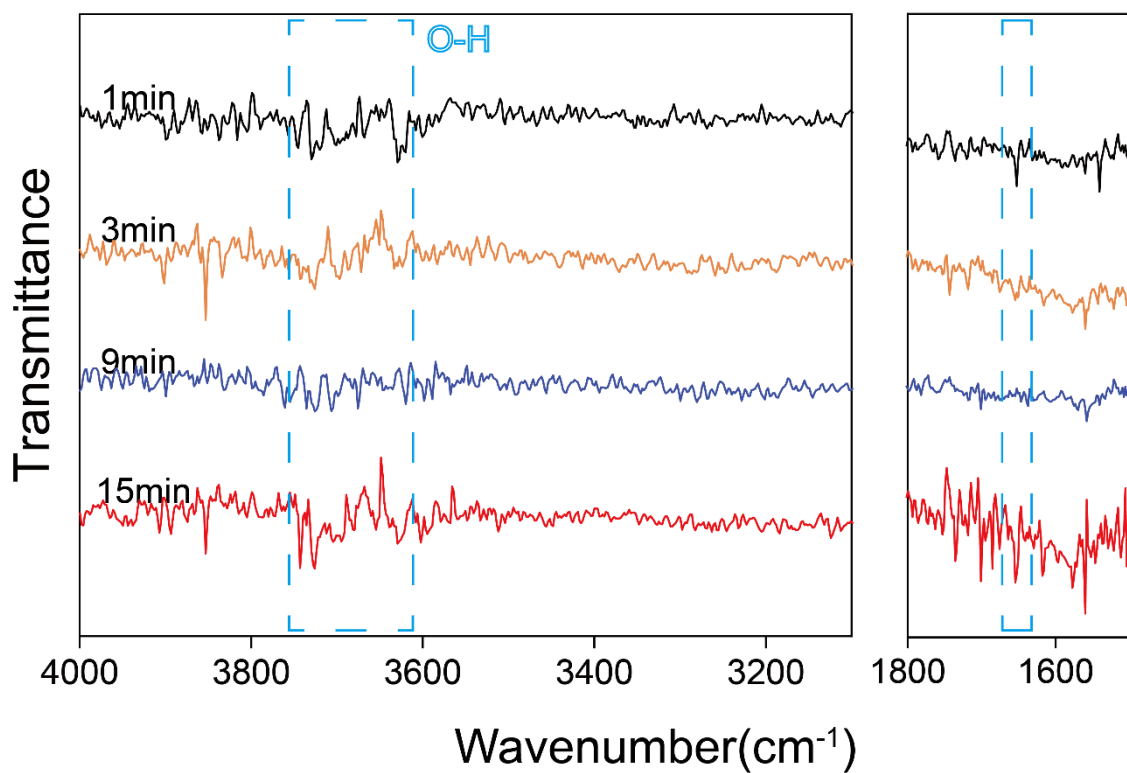

**Supplementary Fig. 7 Attenuated Total Reflection Fourier Transform Infrared (ATR-FTIR) spectra of FeCrAl wire at different reaction time.** Reaction conditions: 14 mg PE, 44 mg CO<sub>2</sub>, 4 A (6 Ω).

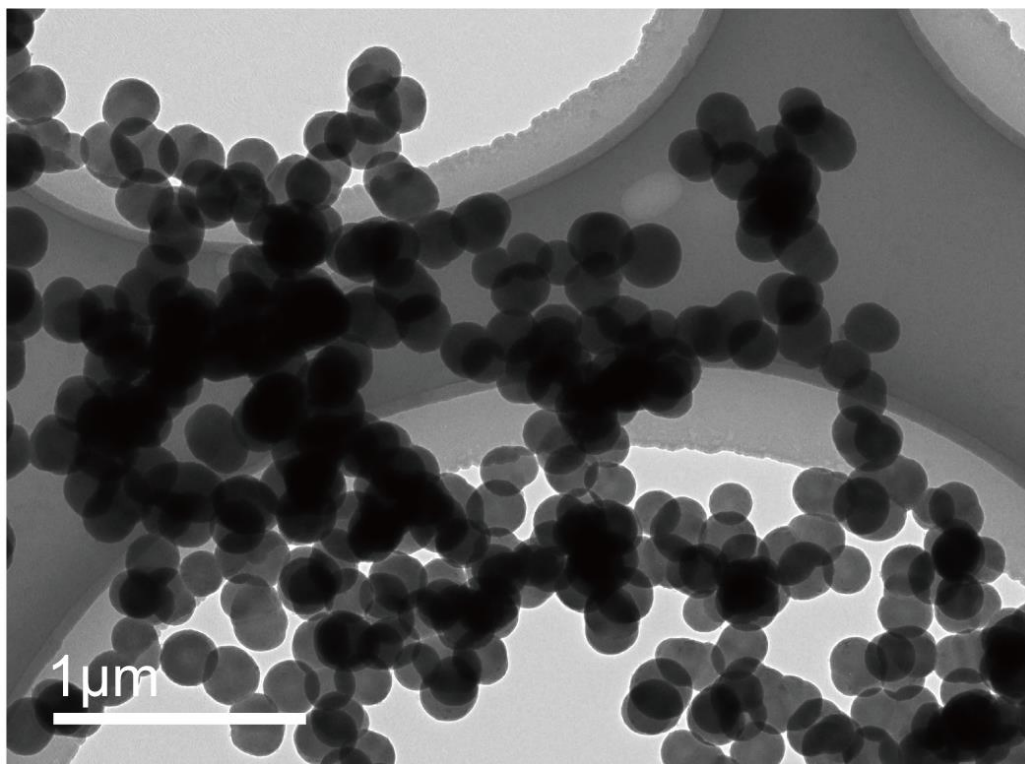

**Supplementary Fig. 8** TEM image of residual carbon achieved in PE dehydrogenation. Reaction conditions: 14 mg PE, Ar, 4 A ( $6 \Omega$ ), 15 min.

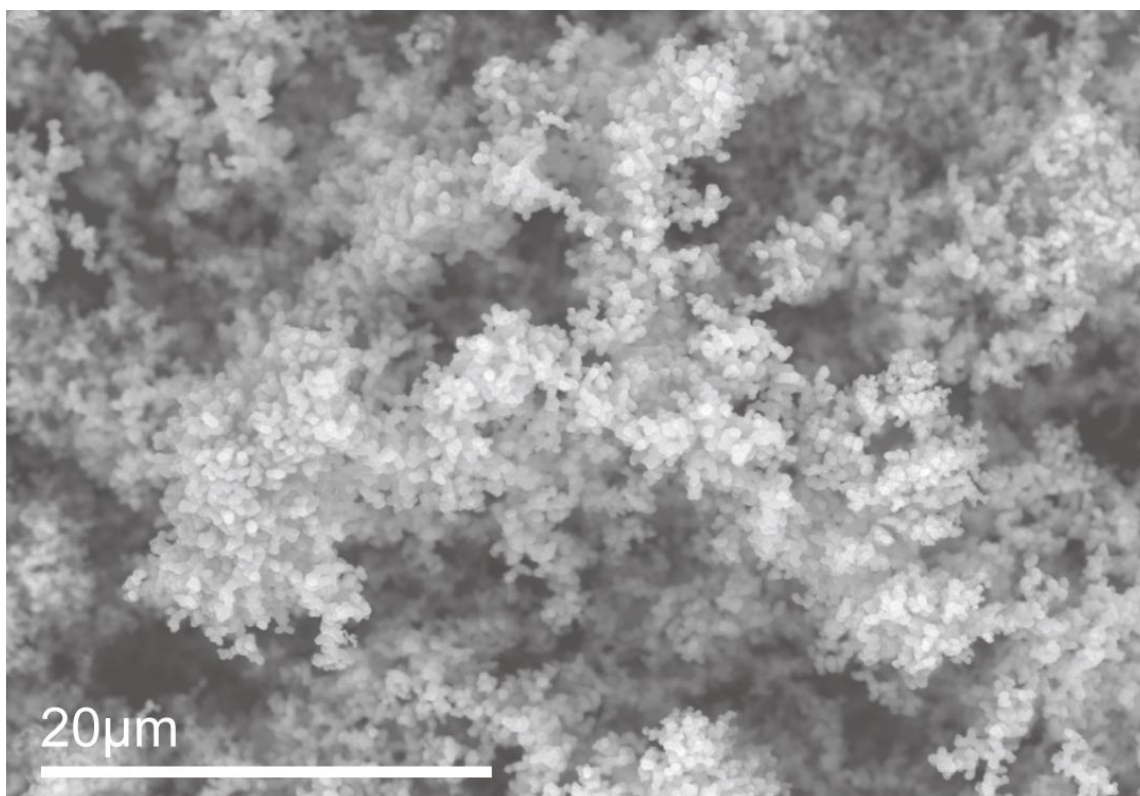

**Supplementary Fig. 9 SEM image of residual carbon achieved in PE dehydrogenation.** Reaction conditions: 14 mg PE, Ar, 4 A (6  $\Omega$ ), 15 min.

## Supplementary Tables

**Supplementary Table 1. The detailed weight analysis from one practical experiment.<sup>1</sup>**

| Conditions      | Part                                       | Weight (g) <sup>2</sup> |
|-----------------|--------------------------------------------|-------------------------|
|                 | PE                                         | 0.0140                  |
| Before reaction | A<br>(Porcelain boat + wire)               | 9.3547                  |
|                 | B<br>(Quartz tube)                         | 44.9872                 |
| After reaction  | C<br>(Porcelain boat + wire + quartz tube) | 54.3544                 |

1 Reaction conditions: 14 mg PE, Ar, 4 A (6 Ω), 15 min.

2 All involved mass was weighted by a balance, and the mass of carbon was calculated by the following formula:

$$n_c(\text{mmol}) = \left( \frac{C - A - B}{12} \right) * 10^3 \quad (1)$$

**Supplementary Table 2. The detailed products distribution, carbon balance and mass balance in the PE dehydrogenation.**

| Reaction time(min) | n <sub>H2</sub> (mmol) | n <sub>CO</sub> (mmol) | n <sub>CO2</sub> (mmol) | n <sub>CH4</sub> (mmol) | n <sub>C2+</sub> (mmol) | n <sub>solid</sub> (mmol) | Carbon balance (%) | Mass balance (%) |
|--------------------|------------------------|------------------------|-------------------------|-------------------------|-------------------------|---------------------------|--------------------|------------------|
| 15                 | 1.003                  | 0.000468               | 0.000430                | 0.0137                  | 0.000759                | 1.05                      | 106.5              | 106.2            |

$$\text{carbon balance} = \frac{n_{CO} + n_{CO_2}(\text{on GC}) + n_{CH_4} + 2n_{C_2H_x} + 3C_3H_x + \frac{m_{solid}}{12}}{\frac{m_{PE}}{14} + n_{CO_2}(\text{original})} \times 100\% \quad (2)$$

$$\text{mass balance} = \frac{2n_{H_2} + 28n_{CO} + 44n_{CO_2}(\text{on GC}) + 16n_{CH_4} + 30n_{C_2H_6} + 28n_{C_2H_4} + 44C_3H_8 + m_{solid}}{m_{PE} + m_{CO_2}(\text{original})} \times 100\% \quad (3)$$

**Supplementary Table 3. The detailed products distribution with carbon fiber as heating element in dry reforming of PE.**

| Reaction time(min) | n H <sub>2</sub> (mmol) | n CO (mmol) | n CO <sub>2</sub> (mmol) | n CH <sub>4</sub> (mmol) | N C <sub>2</sub> + (mmol) | n solid (mmol) | Carbon balance of reaction (%) |
|--------------------|-------------------------|-------------|--------------------------|--------------------------|---------------------------|----------------|--------------------------------|
| 15                 | 0.57                    | 1.18        | 0.26                     | 0.018                    | 0.003                     | 0.29           | 87                             |

**Supplementary Table 4. The quantitative analysis of various products from the large-scale reaction<sup>1</sup>**

| Reaction time(min) | n H <sub>2</sub> (mmol) | n CO (mmol) | n CO <sub>2</sub> (mmol) | n CH <sub>4</sub> (mmol) | n C <sub>2</sub> + (mmol) | m solid (mg) | Carbon balance (%) |
|--------------------|-------------------------|-------------|--------------------------|--------------------------|---------------------------|--------------|--------------------|
| 30                 | 45.3                    | 101.4       | 110                      | 2.5                      | 1.7                       | 480          | 99                 |

<sup>1</sup> Reaction conditions: 1g PE, 3.3g CO<sub>2</sub>, 18Ω, 30min.

**Supplementary Table 5. Oxygen balance during the CO<sub>2</sub> reduction**

| Reaction time(min) | n CO <sub>2</sub> (mmol) | n CO (mmol) | Increased Mass of heating wire (mg) | Increased moles of O in heating wire (mmol) |
|--------------------|--------------------------|-------------|-------------------------------------|---------------------------------------------|
| 1                  | 0.93                     | 0.06        | 0.6                                 | 0.0375                                      |
| 3                  | 0.91                     | 0.08        | 0.8                                 | 0.0500                                      |
| 6                  | 0.62                     | 0.26        | 2.2                                 | 0.1354                                      |
| 9                  | 0.30                     | 0.62        | 2.6                                 | 0.1625                                      |
| 15                 | 0.26                     | 0.67        | 10.3                                | 0.6417                                      |

**Supplementary Table 6. Life cycle inventory (LCI) for LCA calculation model**

| Item                                    | Category                           | Quantity  |
|-----------------------------------------|------------------------------------|-----------|
| <b>Raw materials consumption</b>        | Polyethylene (PE)                  | 0.014 g   |
|                                         | Waste CO <sub>2</sub> <sup>1</sup> | 0.044 g   |
| <b>Energy consumption</b>               | Electricity <sup>2</sup>           | 0.024 kwh |
| <b>Total product: Syngas (0.0493 g)</b> |                                    |           |

**Supplementary Table 7. LCI of PV system (collected from Greet software 2022)**

| Item                      | Category                      | Quantity     |
|---------------------------|-------------------------------|--------------|
| <b>PV electric system</b> | Copper Wire                   | 3867.6386 kg |
|                           | Brass                         | 7.5034 g     |
|                           | Zinc                          | 15.0068 kg   |
|                           | Steel                         | 290.3213 kg  |
|                           | Nylon 6                       | 86.2892 kg   |
|                           | High-Density Polyethylene     | 3727.5248 kg |
|                           | Polyvinyl Chloride            | 235.5171 kg  |
|                           | Polycarbonate                 | 0.7503 kg    |
|                           | Liquid Epoxy                  | 0.7503 kg    |
| <b>PV mounting</b>        | Aluminum                      | 6.2511 lb    |
|                           | High-Density Polyethylene     | 1.4033 g     |
|                           | High-Impact Polystyrene Resin | 7.0167 g     |
|                           | Steel                         | 1.4999 kg    |
|                           | Copper wire                   | 0.1000 kg    |
|                           | Polyurethane Rigid Foam       | 60 g         |
|                           | Electricity <sup>2</sup>      | 14.9500 Wh   |
|                           | <b>Inverter</b>               | Aluminum     |
|                           | Steel                         | 9792 kg      |
|                           | Polypropylene                 | 150 kg       |
|                           | Electricity <sup>2</sup>      | 15196 MJ     |

|                                                |                                  |              |
|------------------------------------------------|----------------------------------|--------------|
|                                                | Diesel For Non-Road Applications | 90MJ         |
|                                                | Natural Gas                      | 5112 MJ      |
|                                                | Tin                              | 3.8371 kg    |
|                                                | Magnet                           | 13.9720 kg   |
|                                                | Copper wire                      | 2277 kg      |
|                                                | Nylon 6                          | 485 kg       |
|                                                | Polyethylene Terephthalate (PET) | 300 kg       |
|                                                | Acrylic Acid                     | 150 kg       |
| <hr/>                                          |                                  |              |
| <b>PV module treatment</b>                     | Electricity <sup>2</sup>         | 189.8491 Btu |
|                                                | Diesel For Non-Road Applications | 30.7151 Btu  |
|                                                | Electricity <sup>2</sup>         | 0.1113 kwh   |
|                                                | Diesel For Non-Road Applications | 64.8315 kJ   |
| <b>Total product: Solar PV system (1 item)</b> |                                  |              |
| <hr/>                                          |                                  |              |

<sup>1</sup>In the actual experimental status, CO<sub>2</sub> compressed gas is used.

<sup>2</sup>The electricity power consumption in all models is China mix which can be selected in the GREET 2022 (Greenhouse gases, Regulated Emissions, and Energy use in Technologies).

**Supplementary Table 8. The higher heating values (HHV) of gaseous products and chemical energy of PE.**

| Chemicals                     | HHV <sup>1</sup> (KJ/mol) | Chemical Energy (MJ/kg) |
|-------------------------------|---------------------------|-------------------------|
| H <sub>2</sub>                | 286                       |                         |
| CO                            | 283                       |                         |
| CH <sub>4</sub>               | 889                       |                         |
| C <sub>2</sub> H <sub>4</sub> | 1418                      |                         |
| C <sub>2</sub> H <sub>6</sub> | 1560                      |                         |
| C <sub>3</sub> H <sub>6</sub> | 2220                      |                         |
| PE                            | --                        | 45.9 <sup>2</sup>       |



**Supplementary Table 9. The energy recovery efficiency of the reforming system powered by a photovoltaic power system (PV) utilizing solar irradiation or Chinese electricity grids.**

| Chemicals/electricity         | n<br>(mmol) | Chemical<br>energy<br>(KJ) | Output<br>energy<br>(KJ) | Input<br>energy<br>(KJ) | Energy recovery<br>efficiency <sup>3</sup><br>(%) |                    |
|-------------------------------|-------------|----------------------------|--------------------------|-------------------------|---------------------------------------------------|--------------------|
|                               |             |                            |                          |                         | Electricity<br>grids                              | Solar PV<br>system |
| H <sub>2</sub>                | 0.71        | 0.2031                     | 0.6912                   | -                       | 0.60                                              | 107.5              |
| CO                            | 1.70        | 0.4811                     |                          | -                       |                                                   |                    |
| CH <sub>4</sub>               | 0.00672     | 0.0060                     |                          | -                       |                                                   |                    |
| C <sub>2</sub> H <sub>4</sub> | 0.0004487   | 0.00064                    |                          | -                       |                                                   |                    |
| C <sub>2</sub> H <sub>6</sub> | 9.868E-05   | 0.00015                    |                          | -                       |                                                   |                    |
| C <sub>3</sub> H <sub>6</sub> | 7.74884E-05 | 0.00017                    |                          | -                       |                                                   |                    |
| PE                            | 1 (14 mg)   |                            |                          | 0.6426                  |                                                   |                    |
| Electricity                   | -           | -                          |                          | 115.2                   |                                                   |                    |

The chemical energy of gaseous products was calculated according to the moles and the HHV or chemical energy listed in Supplementary Table 7. For example, the chemical energy of H<sub>2</sub> achieved in the optimal reaction can be achieved as follow:

$$0.71 \times 10^{-3} \text{ mol} \times 286 \text{ KJ} / \text{mol} = 0.2031 \text{ KJ} \quad (4)$$

The output energy is the sum of the chemical energy of all products.

The input energy in the optimal reaction powered by electricity grids includes the chemical energy of PE and the electricity consumption that was measured by a coulombmeter. According to the coulombmeter, 0.032 KWh of electricity was consumed in an optimal reaction, which corresponds to the energy of 115.2 kJ.

The energy recovery efficiency in an optimal reaction powered by electricity grids was calculated according to the following formula:

$$\text{Energy recovery efficiency} = \text{output energy} / (\text{PE chemical energy} + \text{electricity energy}) \times 100 \% \quad (5)$$

However, the energy recovery efficiency of a reaction powered PV system under solar irradiation was calculated according to the following formula:

$$\text{Energy recovery efficiency} = \text{output energy} / (\text{PE chemical energy}) \times 100 \% \quad (6)$$

### Supplementary References

1. [https://www.liquisearch.com/heat\\_of\\_combustion/heat\\_of\\_combustion\\_tables](https://www.liquisearch.com/heat_of_combustion/heat_of_combustion_tables).
2. Splitstone PL, Johnson WH. The enthalpies of combustion and formation of linear polyethylene. *Journal of Research of the National Bureau of Standards Section A, Physics and Chemistry* **78**, 611 (1974).
3. Luo J, *et al.* Leveraging CO<sub>2</sub> to directionally control the H<sub>2</sub>/CO ratio in continuous microwave pyrolysis/gasification of waste plastics: Quantitative analysis of CO<sub>2</sub> and density functional theory calculations of regulation mechanism. *Chem. Eng. J.* **435**, 134794 (2022).
